# Supplementary material
Source: PubMed Central journal article supplement (PMC7416431)
Supplement: NIHMS1594590-supplement-Supplemental_Material.pdf [file NIHMS1594590-supplement-Supplemental_Material.pdf]

Supplemental Table 1.  
*Sample Descriptive Statistics*

| Sample Characteristic                         | <i>n</i> | %      |
|-----------------------------------------------|----------|--------|
| Male                                          | 684      | 50.55% |
| Race                                          |          |        |
| White                                         | 1,053    | 77.83% |
| Black/African American                        | 234      | 17.29% |
| American Indian/Alaskan Native                | 41       | 3.03%  |
| Asian                                         | 29       | 2.14%  |
| Native Hawaiian/other Pacific Islander        | 10       | 0.74%  |
| Ethnicity                                     |          |        |
| Hispanic/Latino                               | 179      | 13.23% |
| Married                                       | 665      | 49.15% |
| Highest Education                             |          |        |
| High school/GED                               | 136      | 10.05% |
| Vocational post high school                   | 54       | 3.99%  |
| Some college                                  | 472      | 34.89% |
| Associates degree                             | 223      | 16.48% |
| College degree                                | 322      | 23.80% |
| Masters or Doctorate                          | 139      | 10.27% |
| Did not report                                | 7        | 0.52%  |
| Sexual Orientation                            |          |        |
| Heterosexual                                  | 1,088    | 80.41% |
| Gay, lesbian, bisexual, or other              | 91       | 6.73%  |
| Did not report                                | 174      | 12.86% |
| Marine Corps veteran                          | 128      | 9.46%  |
| Multiple Deployments                          | 454      | 33.56% |
| VA SCD for PTSD                               | 694      | 51.29% |
| Enrolled in mental health treatment before T1 | 1,208    | 89.28% |
| In mental health treatment T2                 | 682      | 50.41% |
| In mental health treatment T3                 | 659      | 48.71% |
| In mental health treatment T4                 | 597      | 44.12% |
| Any TBI                                       | 465      | 34.37% |
| Moderate/Severe TBI                           | 119      | 8.80%  |

*Note.* Race categories are not mutually exclusive; GED = General Educational Development; PTSD = posttraumatic stress disorder; SCD = service-connected disability; TBI = traumatic brain injury; VA = Department of Veterans Affairs.

## Supplemental Table 2.

*Sample Trauma Characteristics*

| Sample Characteristic                                               | <i>n</i> | %      |
|---------------------------------------------------------------------|----------|--------|
| Time of Index Trauma Occurrence                                     |          |        |
| Before Deployment                                                   | 49       | 3.62%  |
| During Deployment                                                   | 1,287    | 95.12% |
| After Deployment                                                    | 14       | 1.03%  |
| Index Trauma Category                                               |          |        |
| Combat                                                              | 1,165    | 86.10% |
| Sexual assault                                                      | 78       | 5.76%  |
| Any other very stressful event or experience or multiple categories | 28       | 2.07%  |
| Transportation accident                                             | 19       | 1.40%  |
| Severe human suffering                                              | 14       | 1.03%  |
| Physical assault                                                    | 13       | 0.96%  |
| Sudden violent death                                                | 9        | 0.67%  |
| Serious accident at work, home or during recreational activity      | 7        | 0.52%  |
| Assault with a weapon                                               | 6        | 0.44%  |
| Other unwanted or uncomfortable sexual experience                   | 5        | 0.37%  |
| Sudden accidental death                                             | 4        | 0.30%  |
| Life threatening illness or injury                                  | 3        | 0.22%  |
| Serious injury, harm, or death you caused to someone else           | 2        | 0.15%  |
| Military Sexual Trauma (VA screen)                                  | 254      | 18.77% |
| Lifetime Trauma Exposure (directly experienced)                     |          |        |
| Combat or exposure to a warzone                                     | 1,278    | 94.46% |
| Transportation accident                                             | 803      | 59.35% |
| Physical assault                                                    | 723      | 53.44% |
| Fire or explosion                                                   | 677      | 50.04% |
| Sudden, unexpected death of someone close                           | 664      | 49.08% |
| Assault with a weapon                                               | 635      | 46.93% |
| Natural disaster                                                    | 501      | 37.03% |
| Exposure to a toxic substance                                       | 495      | 36.59% |
| Other unwanted or uncomfortable sexual experience                   | 490      | 36.22% |
| Caused serious injury, harm, or death to others                     | 388      | 28.68% |
| Serious accident at work, home, or during recreational activity     | 378      | 27.94% |
| Sexual assault                                                      | 367      | 27.12% |
| Life threatening illness or injury                                  | 320      | 23.65% |
| Sudden, violent death                                               | 191      | 14.12% |
| Severe human suffering                                              | 178      | 13.16% |
| Captivity                                                           | 31       | 2.29%  |

Supplemental Table 3  
*Descriptive Statistics of Included Variables*

|                                     | Mean  | SD    | Min   | Max   |
|-------------------------------------|-------|-------|-------|-------|
| Age at Index Trauma                 | 31.29 | 9.81  | 13    | 64    |
| Years Since Index Trauma            |       |       |       |       |
| T1                                  | 5.95  | 2.24  | 0.5   | 18    |
| T2                                  | 8.42  | 2.20  | 1.59  | 20.19 |
| T3                                  | 9.42  | 2.21  | 21.15 | 21.15 |
| T4                                  | 10.59 | 2.21  | 4.14  | 22.22 |
| PCL Total                           |       |       |       |       |
| T1                                  | 44.15 | 18.42 | 0     | 80    |
| T2                                  | 41.41 | 19.76 | 0     | 80    |
| T3                                  | 41.80 | 19.89 | 0     | 80    |
| T4                                  | 37.94 | 20.41 | 0     | 80    |
| PHQ-9 total                         |       |       |       |       |
| T1                                  | 13.44 | 6.58  | 0     | 27    |
| T2                                  | 12.08 | 6.68  | 0     | 27    |
| T3                                  | 12.28 | 6.79  | 0     | 27    |
| T4                                  | 12.17 | 6.77  | 0     | 27    |
| AUDIT total                         |       |       |       |       |
| T1                                  | 7.60  | 6.62  | 1     | 35    |
| T2                                  | 7.13  | 6.81  | 1     | 35    |
| T3                                  | 7.11  | 7.05  | 1     | 40    |
| T4                                  | 6.28  | 6.36  | 1     | 40    |
| PHQ-9 item 9 (SI)                   |       |       |       |       |
| T1                                  | 0.45  | 0.77  | 0     | 3     |
| T2                                  | 0.41  | 0.74  | 0     | 3     |
| T3                                  | 0.46  | 0.77  | 0     | 3     |
| T4                                  | 0.43  | 0.77  | 0     | 3     |
| CTQ Physical Abuse                  | 9.21  | 4.54  | 5     | 25    |
| CTQ Sexual Abuse                    | 8.00  | 5.44  | 5     | 25    |
| LEC Categories Endorsed             | 6.01  | 2.86  | 0     | 16    |
| DRRI Combat                         | 33.78 | 12.91 | 16    | 80    |
| DRRI Aftermath                      | 33.75 | 13.03 | 16    | 80    |
| DRRI Post-Deployment Social Support | 48.99 | 11.18 | 15    | 75    |

*Note.* AUDIT = Alcohol Use Disorders Identification Test; CTQ = Childhood Trauma Questionnaire; DRRI = Deployment Risk and Resilience Inventory; LEC = Life Events Checklist; PCL = PTSD Checklist, PHQ-9 = 9-item Patient Health Questionnaire, SI = suicidal ideation.

Supplemental Table 4.

*Fit Indices for Growth Curve Models using Different Model Configurations.*

| Model                             | # Parameters | Loglikelihood | AIC      | BIC      |
|-----------------------------------|--------------|---------------|----------|----------|
| Full Sample – Fixed Effects       |              |               |          |          |
| Fixed intercept                   | 3            | -23809.08     | 47624.16 | 47639.79 |
| Fixed linear                      | 5            | -23806.92     | 47623.84 | 47649.89 |
| Fixed quadratic                   | 7            | -23782.96     | 47579.93 | 47616.40 |
| Full Sample – Mixed Effects       |              |               |          |          |
| Random intercept                  | 4            | -22060.01     | 44128.03 | 44148.87 |
| Random linear                     | 8            | -21873.67     | 43763.34 | 43805.02 |
| Random quadratic                  | 13           | -21847.14     | 43720.29 | 43788.02 |
| Deployment Trauma – Fixed Effects |              |               |          |          |
| Fixed intercept                   | 3            | -22943.60     | 45893.20 | 45908.72 |
| Fixed linear                      | 5            | -22940.13     | 45890.26 | 45916.13 |
| Fixed quadratic                   | 7            | -22924.98     | 45863.96 | 45900.17 |
| Deployment Trauma – Mixed Effects |              |               |          |          |
| Random intercept                  | 4            | -21283.39     | 42574.77 | 42595.46 |
| Random linear                     | 8            | -21094.68     | 42205.36 | 42246.75 |
| Random quadratic                  | 13           | -21070.53     | 42167.07 | 4223432  |
| First 10 Years – Fixed Effects    |              |               |          |          |
| Fixed intercept                   | 3            | -23000.03     | 46006.05 | 46021.57 |
| Fixed linear                      | 5            | -22997.89     | 46005.79 | 46031.65 |
| Fixed quadratic                   | 7            | -22980.47     | 45974.94 | 46011.15 |
| First 10 Years – Mixed Effects    |              |               |          |          |
| Random intercept                  | 4            | 21446.96      | 42901.93 | 42922.62 |
| Random linear                     | 8            | -21275.05     | 42556.11 | 42607.49 |
| Random quadratic                  | 13           | -21243.45     | 42512.91 | 42580.16 |
| 10-20 years – Fixed Effects       |              |               |          |          |
| Fixed intercept                   | 5            | -22086.26     | 44182.52 | 44208.39 |
| Fixed linear                      | 7            | -22084.60     | 44183.19 | 44219.40 |
| 10-20 years – Mixed Effects       |              |               |          |          |
| Random intercept                  | 6            | -20870.57     | 41753.15 | 41784.19 |
| Random linear                     | 10           | -20805.36     | 41630.72 | 41682.45 |

*Note.* AIC = Akaike information criterion; BIC = Bayesian information criterion.

Supplemental Table 5.

*Unstandardized Parameter Estimates (and Standard Errors) of Growth Curve Model Predictors in Univariate Models.*

|                               | Full Sample (N = 1,353) |              |                 | Deployment Trauma (N = 1,304) |              |                 |
|-------------------------------|-------------------------|--------------|-----------------|-------------------------------|--------------|-----------------|
|                               | Intercept               | Linear Slope | Quadratic Slope | Intercept                     | Linear Slope | Quadratic Slope |
| <b>Demographic Variables</b>  |                         |              |                 |                               |              |                 |
| Male Sex                      | 2.30 (3.23)             | -0.03 (0.74) | -0.03 (0.04)    | -0.28 (3.51)                  | 0.46 (0.83)  | -0.06 (0.05)    |
| Racial Minority               | 6.95 (4.13)             | -0.49 (0.91) | 0.03 (0.05)     | 5.00 (4.43)                   | -0.17 (1.03) | 0.01 (0.06)     |
| Hispanic Ethnicity            | -12.13 (4.66)*          | 2.78 (1.10)* | -0.11 (0.07)    | -10.45 (4.91)*                | 2.45 (1.19)* | -0.10 (0.07)    |
| Education                     | -2.41 (1.11)*           | 0.02 (0.25)  | 0.01 (0.02)     | -1.97 (1.23)                  | -0.07 (0.29) | 0.01 (0.02)     |
| Military Branch (0=Army)      | -                       | -            | -               | 4.01 (5.81)                   | -1.98 (1.33) | 0.14 (0.08)     |
| <b>Trauma Variables</b>       |                         |              |                 |                               |              |                 |
| Combat                        | -                       | -            | -               | 0.68 (0.14)*                  | -0.04 (0.03) | <0.01 (<0.01)   |
| Battle Aftermath              | -                       | -            | -               | 0.59 (0.14)*                  | -0.03 (0.03) | <0.01 (<0.01)   |
| Post-Deploy Social Support    | -                       | -            | -               | -0.93 (0.13)*                 | 0.03 (0.03)  | <0.01 (<0.01)   |
| Any TBI                       | 7.34 (3.53)*            | -0.85 (0.78) | 0.05 (0.05)     | 6.71 (3.96)                   | -0.83 (0.95) | 0.53 (0.06)     |
| Moderate/Severe TBI           | 4.94 (5.45)             | 0.02 (1.21)  | <0.01 (0.07)    | 3.78 (6.21)                   | 0.12 (1.47)  | -0.01 (0.09)    |
| MST                           | 3.67 (4.22)             | -0.06 (0.90) | 0.01 (0.05)     | 4.68 (4.88)                   | -0.28 (1.15) | 0.02 (0.07)     |
| Trauma Categories             | 2.45 (0.45)*            | -0.18 (0.10) | 0.01 (0.01)     | 2.31 (0.51)*                  | -0.14 (0.12) | <0.01 (0.01)    |
| Multiple Deployments          | -                       | -            | -               | 6.11 (3.89)                   | -1.61 (0.93) | 0.06 (0.06)     |
| Childhood Physical Abuse      | 0.87 (0.39)             | 0.01 (0.09)  | <0.01 (0.01)    | 0.86 (0.43)*                  | 0.03 (0.10)  | <0.01 (0.01)    |
| Childhood Sexual Abuse        | 0.63 (0.29)*            | <0.01 (0.06) | <0.01 (<0.01)   | 0.63 (0.31)*                  | 0.01 (0.08)  | <0.01 (0.01)    |
| <b>Peritraumatic Emotions</b> |                         |              |                 |                               |              |                 |
| Fear                          | 2.47 (3.74)             | 0.05 (0.89)  | <0.01 (0.05)    | 3.55 (3.78)                   | -0.17 (0.91) | 0.01 (0.06)     |
| Helplessness                  | 6.95 (3.45)*            | -1.12 (0.81) | 0.09 (0.05)     | 7.59 (3.55)*                  | -1.11 (0.85) | 0.08 (0.05)     |
| Horror                        | 10.10 (3.16)*           | -0.55 (0.72) | 0.03 (0.04)     | 12.07 (3.38)*                 | -1.07 (0.81) | 0.06 (0.05)     |
| Numbing                       | 13.32 (3.28)*           | -0.80 (0.73) | 0.02 (0.04)     | 14.90 (3.66)*                 | -1.15 (0.86) | 0.04 (0.05)     |

*Note.* All analyses adjusted for age at time of index trauma; Deploy. = deployment; MST = military sexual trauma; TBI = traumatic brain injury; \* =  $p < .05$ .

Supplemental Table 6.

*Unstandardized Parameter Estimates (and Standard Errors) of Growth Curve Models Predictors in Multivariable Models among Deployment Subsample.*

| Model and Predictors                                    | Intercept      | Linear Slope | Quadratic Slope |
|---------------------------------------------------------|----------------|--------------|-----------------|
| <b>Model 1: Demographics</b>                            |                |              |                 |
| Age at Index Trauma                                     | -0.28 (0.16)   | 0.02 (0.04)  | <0.01 (<0.01)   |
| Hispanic Ethnicity                                      | -10.45 (4.91)* | 2.45 (1.19)* | -0.10 (0.07)    |
| <b>Model 2: Demographics and Trauma Characteristics</b> |                |              |                 |
| Age at Index Trauma                                     | -0.23 (0.16)   | 0.01 (0.04)  | <0.01 (<0.01)   |
| Hispanic Ethnicity                                      | -10.44 (4.56)* | 2.40 (1.31)* | -0.10 (0.07)    |
| Combat                                                  | 0.31 (0.21)    | -0.02 (0.05) | <0.01 (<0.01)   |
| Battle Aftermath                                        | 0.22 (0.19)    | -0.01 (0.05) | <0.01 (<0.01)   |
| Post-Deployment Social Support                          | -0.78 (0.14)*  | 0.04 (0.03)  | <0.01 (<0.01)   |
| Trauma Categories                                       | 0.55 (0.57)    | -0.01 (0.14) | <0.01 (<0.01)   |
| Childhood Physical Abuse                                | 0.03 (0.43)    | 0.06 (0.11)  | <0.01 (0.01)    |
| Childhood Sexual Abuse                                  | 0.37 (0.33)    | 0.01 (0.08)  | <0.01 (0.01)    |
| Peritraumatic Helplessness                              | 3.69 (3.67)    | -0.73 (0.92) | 0.07 (0.06)     |
| Peritraumatic Horror                                    | 6.42 (3.27)*   | -0.53 (0.81) | 0.03 (0.05)     |
| Peritraumatic Numbing                                   | 5.40 (3.50)    | -0.24 (0.84) | <0.01 (0.05)    |
| <b>Model 3: Trimmed Model</b>                           |                |              |                 |
| Age at Index Trauma                                     | -0.22 (0.15)   | 0.01 (0.04)  | <0.01 (<0.01)   |
| Hispanic Ethnicity                                      | -11.47 (4.55)* | 2.61 (1.12)* | -0.11 (0.07)    |
| Post-Deployment Social Support                          | -0.92 (0.13)*  | 0.03 (0.03)  | <0.01 (<0.01)   |
| Peritraumatic Horror                                    | 9.74 (3.18)*   | -0.83 (0.77) | 0.05 (0.05)     |

*Note.* All analyses adjusted for age at time of index trauma; \* =  $p < .05$ .

Supplemental Table 7.

*Unstandardized Parameter Estimates (and Standard Errors) of Covariate Models among the Deployment Subsample.*

| Model/Covariate                       | PTSD T1       | PTSD T2      | PTSD T3      | PTSD T4      |
|---------------------------------------|---------------|--------------|--------------|--------------|
| Model 1 – Depression                  | -             | -            | -            | -            |
| Depression T1                         | 2.13 (0.05)*  | 0.43 (0.07)* | -            | -            |
| Depression T2                         | -             | 1.65 (0.07)* | 0.43 (0.07)  | -            |
| Depression T3                         | -             | -            | 1.65 (0.07)* | 0.54 (0.08)* |
| Depression T4                         | -             | -            | -            | 1.42 (0.08)* |
| Model 2 – Suicidal Ideation           |               |              |              |              |
| Suicidal Ideation T1                  | 8.07 (0.55)*  | 2.86 (0.53)* | -            | -            |
| Suicidal Ideation T2                  | -             | 5.10 (0.55)* | 1.88 (0.52)* | -            |
| Suicidal Ideation T3                  | -             | -            | 6.68 (0.50)* | 2.14 (0.68)* |
| Suicidal Ideation T4                  | -             | -            | -            | 5.61 (0.62)* |
| Model 3 – Alcohol Abuse               |               |              |              |              |
| Alcohol Abuse T1                      | 0.75 (0.08)*  | 0.19 (0.08)* | -            | -            |
| Alcohol Abuse T2                      | -             | 0.46 (0.09)* | 0.08 (0.10)  | -            |
| Alcohol Abuse T3                      | -             | -            | 0.63 (0.10)* | 0.11 (0.12)  |
| Alcohol Abuse T4                      | -             | -            | -            | 0.49 (0.11)* |
| Model 4 – Psychological Treatment     |               |              |              |              |
| Treatment T1                          | 9.10 (0.84)*  | -            | -            | -            |
| Treatment T2                          | -             | 5.84 (0.70)* | -            | -            |
| Treatment T3                          | -             | -            | 6.32 (0.67)* | -            |
| Treatment T4                          | -             | -            | -            | 3.41 (0.80)* |
| Model 5 – VA SC PTSD Disability (y/n) | 10.63 (1.10)* | 8.80 (1.10)* | 8.48 (1.13)* | 5.54 (1.20)* |

*Note.* PTSD = posttraumatic stress disorder; SC = service-connected disability; VA = Department of Veterans Affairs; \* =  $p < .05$ .
